# Supplementary material
Source: PubMed Central journal article supplement (PMC2579796)

**Additional Supporting Information for Ciarleglio et al.:**  
**“Genetic Differences in Human Circadian Clock Genes Among Worldwide Populations”**

Table S1: Further information about the SNPs studied in this report.

Table S2. Allele frequencies studied in all populations with deviations from Hardy/Weinberg Equilibrium (HWE).

Table S3: Allele Frequency Differences.

Table S4: Genotype Frequency Differences.

Table S5. Haplotype frequencies.

Table S6: Haplotype Trend Regression.

Table S7:  $F_{ST}$  values (theta P) for the five populations together and for the PNG sub-populations.

Table S8: Allele frequencies for all polymorphisms in the Papua New Guinea (PNG) sub-populations with deviations from Hardy/Weinberg Equilibrium (HWE).

Table S9:  $F_{ST}$  values for clock gene SNPs among the PNG populations, grouped as: Eastern Highlands, Coastal, and Nasioi.

Table S10:  $F_{ST}$  values (theta P) for all pair-wise combinations of populations.

Figure S1. Histogram plots of *Arntl* and *Arntl2* SNPs.

Figure S2. Histogram plots of SNPs in *hClock* and *hAANAT*.

**Table S1.** Further information about the SNPs studied in this report.

| Genes         | Location | Genomic size (bp) | Chromosomal position | SNPs       | Flanking Sequence | Ensembl Genomic Reference Sequence | Ensembl Coding Reference Sequence | Primers (forward and reverse, 5'-3')           | Reference                                                        |                       |
|---------------|----------|-------------------|----------------------|------------|-------------------|------------------------------------|-----------------------------------|------------------------------------------------|------------------------------------------------------------------|-----------------------|
| <i>Arntl</i>  | 11p15.2  | 109 487           | 13286395             | ss95215854 | catgtttaa         | ENSG00000133794                    |                                   | GTGGTGAGAAATGGTCAC<br>CATGCTAACAATGCTCAG       | n/a<br>n/a                                                       |                       |
|               |          |                   | 13288144             | ss95215855 | CCCAAGCTT         | ENSG00000133794                    | ENST00000256172                   | GTCCAATGGATTTAAAGGAC<br>CTGGTAACCTCCACAGA      | n/a<br>n/a                                                       |                       |
|               |          |                   | 13335041             | ss95215856 | cactgtgtc         | ENSG00000133794                    | ENST00000256172                   | CAGACAAAGATGACCCTC<br>CCTTGGTGTCTGTATATTC      | n/a<br>n/a                                                       |                       |
|               |          |                   |                      |            |                   |                                    |                                   | CCTGGCTTCTGTGTTATTTA<br>GTCCTTTAGCATTCTGCT     | n/a<br>n/a                                                       |                       |
| <i>Arntl2</i> | 12p11.23 | 87 478            | 27374970             | rs5797225  | gttgtgtgt         |                                    |                                   | ATCTAAGTGGCTTTAGGG<br>TCATTGCTAAGTACTCAGG      | n/a<br>n/a                                                       |                       |
|               |          |                   | 27375106             | rs7137588  | cggtgtcc          |                                    |                                   |                                                | n/a                                                              |                       |
|               |          |                   | 27375125             | rs11048972 | atggacaaa         |                                    |                                   |                                                | n/a                                                              |                       |
|               |          |                   | 27375128             | ss95215857 | acaaaggag         | ENSG00000029153                    |                                   |                                                | n/a                                                              |                       |
|               |          |                   | 27375878             | rs10548381 | ttctactactaa      |                                    |                                   |                                                | CATCTCTGAACCTCTGTTC<br>CTTGGCTTCCAGACAAG                         | n/a<br>n/a            |
|               |          |                   | 27420486             | rs4964059  | ctctatcaa         |                                    |                                   |                                                | GGAGAATGGTTTATGTAGAC                                             | n/a                   |
|               |          |                   | 27420525             | ss95215858 | gatatttta         | ENSG00000029153                    | ENST00000261178                   |                                                | ACTCACCATGTACCATCTC                                              | n/a                   |
|               |          |                   | 27464992             | ss95215859 | aaatatctc         | ENSG00000029153                    | ENST00000261178                   |                                                | CTTCCTGTCACAGGGATG<br>GCCAAAACAATATGTAAG                         | n/a<br>n/a            |
| <i>Clock</i>  | 4q12     | 114 337           | 55996126             | rs1801260  | GGCATAGCC         |                                    |                                   | TCCAGCAGTTTCATGAGATGC                          | Katzenberg et al. (1998)                                         |                       |
|               |          |                   | 55996140             | ss95215860 | TGACAGTGT         | ENSG00000134852                    | ENST00000381325                   |                                                | GAGGTCATTTTATAGCTGAGC                                            | n/a                   |
| <i>Per2</i>   | 2q37.3   | 44 406            | 238830546            | ss95215861 | tatggcac          | ENSG00000132326                    | ENST00000254657                   | GGCACTTGGGTGTCGGTTTCTC<br>CCCCTATCGGGCTATGGTGA | Shiino et al. (2003)                                             |                       |
|               |          |                   | 238830402            | rs2304669  | TGGCACTGC         |                                    |                                   |                                                |                                                                  |                       |
|               |          |                   | 238830383            | c.1984A>G  | AGAGAGTGT         | ENSG00000132326                    | ENST00000254657                   |                                                |                                                                  |                       |
|               |          |                   | 238830376            | ss95215862 | GTGGCGTCG         | ENSG00000132326                    | ENST00000254657                   |                                                |                                                                  |                       |
|               |          |                   | 238830375            | rs2304670  | TGGCGTCGC         |                                    |                                   |                                                |                                                                  |                       |
|               |          |                   | 238830372            | rs2304671  | CGTCGCTCA         |                                    |                                   |                                                |                                                                  |                       |
|               |          |                   | 238830273            | ss95215863 | gagagcagt         | ENSG00000132326                    | ENST00000254657                   |                                                |                                                                  |                       |
| <i>Per3</i>   | 1p36.23  | 60 853            | 7792555              | rs35426314 | GAGCGTGTG         |                                    |                                   | ATGATTCTAGATGAGCTCTGCGGTGG                     | Ebisawa et al. (2001)                                            |                       |
|               |          |                   | 7792635              | rs228669   | CCAGTGGGC         |                                    |                                   | GAACCGAGGTAGTACAGAAAACACGATG                   |                                                                  |                       |
|               |          |                   | 7809991              | rs35733104 | CTTACCTCG         |                                    |                                   | ACCTCGAGCCCGACCTTCCCACCTG                      |                                                                  |                       |
|               |          |                   | 7810060              | c.2460A>G  | CTGCACCGG         | AB047532                           | ENST00000361923                   |                                                | CAAAAACGATGGCGACAACAGAGGACA                                      |                       |
|               |          |                   | 7810080              | rs228696   | GGGCTGCCC         |                                    |                                   |                                                |                                                                  |                       |
|               |          |                   | 7810086              | rs35899625 | CCCTGTCC          |                                    |                                   |                                                |                                                                  |                       |
|               |          |                   | 7810166              | rs228697   | CCCCCTGT          |                                    |                                   |                                                |                                                                  |                       |
|               |          |                   | 7810192              | rs17031614 | CATCGTTTT         |                                    |                                   |                                                |                                                                  |                       |
|               |          |                   | del(3031-3084nt)     | AB047536   |                   |                                    |                                   |                                                | GAAGATTAAGTGTCTTTTCATGTGCCCTTAC<br>AATGTCTGGCATTGGAGTTTGAACATTAG | Ebisawa et al. (2001) |
|               |          |                   | 7819720              | rs10462021 | TCTCATGGG         |                                    |                                   |                                                | CGGGAAAAGAACCTGTGCTTATTAG<br>CTACCTGGCCAAAATACATGATATATGAC       | Ebisawa et al. (2001) |
| <i>AAAT</i>   | 17q25.1  | 2 549             | 71974704             | rs3760138  | GTGTGAGCT         |                                    |                                   | CTCTGCAGGGGGTCAAAAG                            |                                                                  |                       |
|               |          |                   | 71974983             | rs4238989  | TGGGCTTGT         |                                    |                                   | CATCTTAATCCCTGCTGTCTAC                         |                                                                  |                       |

SNPs in Table S1 are identified by either rs or ss number with the exception of two SNPs, one in *Per2* (c.1984A>G) and the other in *Per3* (c.2460A>G), which were labelled by the convention described in: den Dunnen JT and Antonarakis SE (2000) Mutation nomenclature extensions and suggestions to describe complex mutations: a discussion. Hum Mutat 5: 7-12.

**Table S2.** Allele frequencies studied in all populations with deviations from Hardy/Weinberg Equilibrium (HWE).

| Gene          | Allele   | African American  | European American | Ghanaian African | Han Chinese | Papua New Guinea  |
|---------------|----------|-------------------|-------------------|------------------|-------------|-------------------|
| <i>Arntl</i>  |          |                   |                   |                  |             |                   |
| ss95215854    | T        | 1.00              | 0.99              | 0.93             | 1.00        | 1.00              |
| ss95215855    | A        | 1.00              | 0.97              | 1.00             | 1.00        | 1.00              |
| ss95215856    | G        | 0.98              | 0.99              | 0.98             | 0.99        | 0.96              |
| <i>Arntl2</i> |          |                   |                   |                  |             |                   |
| rs5797225     | GTT (7)  | 0.01              | -                 | -                | -           | -                 |
|               | GTT (8)  | 0.49              | 0.71              | 0.51             | 0.48        | 0.71              |
|               | GTT (9)  | 0.50              | 0.29              | 0.46             | 0.51        | 0.28              |
|               | GTT (10) | -                 | -                 | 0.03             | 0.01        | 0.01              |
| rs7137588     | G        | 0.86              | 0.73              | 0.87             | 0.93        | 0.75              |
| rs11048972    | A        | 0.98              | 0.94              | 0.87             | 0.98        | 1.00              |
| ss95215857    | A        | 1.00              | 0.96 <sup>+</sup> | 1.00             | 1.00        | 1.00              |
| rs10548381    | +/CTA    | 0.93 <sup>+</sup> | 0.90              | 0.98             | 0.98        | 0.99              |
| rs4964059     | A        | 0.91              | 0.67              | 0.88             | 0.43        | 0.43 <sup>*</sup> |
| ss95215858    | T        | 0.99              | 1.00              | 1.00             | 1.00        | 1.00              |
| ss95215859    | A        | 1.00              | 1.00              | 1.00             | 1.00        | 1.00              |
| <i>Clock</i>  |          |                   |                   |                  |             |                   |
| rs1801260     | T        | 0.86              | 0.74 <sup>*</sup> | 0.83             | 0.92        | 0.83              |
| ss95215860    | A        | 1.00              | 1.00              | 1.00             | 1.00        | 0.96              |

| <u>Per2</u>  |          |                   |      |      |                   |      |
|--------------|----------|-------------------|------|------|-------------------|------|
| rs2304669    | A        | 0.97              | 0.87 | 0.99 | 0.94              | 0.94 |
| c.1984A>G    | A        | 1.00              | 1.00 | 1.00 | 1.00              | 1.00 |
| ss95215862   | C        | N/A               | 1.00 | N/A  | N/A               | N/A  |
| rs2304670    | G        | 0.90              | 0.93 | 0.87 | 0.94              | 1.00 |
| rs2304671    | G        | 0.96              | 0.93 | 0.96 | 0.89              | 1.00 |
| <u>Per3</u>  |          |                   |      |      |                   |      |
| rs35426314   | G        | 1.00              | 1.00 | 1.00 | 1.00              | 1.00 |
| rs228669     | C        | 0.96 <sup>+</sup> | 0.97 | 0.99 | 0.99              | 1.00 |
| rs35733104   | C        | 1.00              | 1.00 | 1.00 | 1.00              | 1.00 |
| c.2460A>G    | A        | 1.00              | 1.00 | 1.00 | 1.00              | 1.00 |
| rs228696     | C        | 0.95 <sup>*</sup> | 0.97 | 0.98 | 1.00              | 1.00 |
| rs228697     | C        | 0.98              | 0.99 | 1.00 | 0.95              | 0.83 |
| rs17031614   | G        | 1.00              | 1.00 | 1.00 | 1.00              | 1.00 |
| AB047536     | 4-repeat | 0.59              | 0.66 | 0.64 | 0.81 <sup>+</sup> | 0.41 |
| rs10462021   | A        | 0.93              | 0.83 | 0.96 | 1.00              | 0.98 |
| <u>AANAT</u> |          |                   |      |      |                   |      |
| rs4238989    | G        | 0.74              | 0.53 | 0.87 | 0.53              | 0.51 |

\* indicates deviation from HWE at  $p < 0.05$

<sup>+</sup> indicates deviation from HWE at  $p < 0.01$

N/A indicates that the marker was not genotyped for that population.

**Table S3:** Allele Frequency Differences (p values listed)

| Marker        | AA vs<br>EA | AA vs<br>GA | AA vs<br>HC | AA vs<br>PNG | EA vs<br>GA | EA vs<br>HC | EA vs<br>PNG | GA vs<br>HC | GA vs<br>PNG | HC vs<br>PNG |
|---------------|-------------|-------------|-------------|--------------|-------------|-------------|--------------|-------------|--------------|--------------|
| <i>Arntl</i>  |             |             |             |              |             |             |              |             |              |              |
| ss95215854    | 1           | 0.012       | N/A         | N/A          | 0.001       | 1           | 0.579        | 0.038       | <0.001       | N/A          |
| ss95215855    | 0.098       | N/A         | N/A         | N/A          | 0.094       | 0.092       | 0.014        | N/A         | N/A          | N/A          |
| ss95215856    | 0.271       | 0.618       | 0.241       | 0.708        | 0.068       | 0.606       | 0.004        | 0.246       | 0.458        | 0.242        |
| <i>Arntl2</i> |             |             |             |              |             |             |              |             |              |              |
| rs5797225     | <0.001      | 0.263       | 0.97        | 0.001        | <0.001      | <0.001      | 0.168        | 0.442       | 0.003        | 0.001        |
| rs7137588     | 0.004       | 0.682       | 0.107       | 0.045        | 0.001       | <0.001      | 0.526        | 0.238       | 0.018        | 0.001        |
| rs11048972    | 0.117       | 0.01        | 0.623       | 0.172        | 0.033       | 0.062       | <0.001       | 0.001       | <0.001       | 0.163        |
| ss95215857    | 0.041       | N/A         | N/A         | N/A          | 0.04        | 0.041       | 0.003        | N/A         | N/A          | N/A          |
| rs10548381    | 0.588       | 0.085       | 0.095       | 0.036        | 0.007       | 0.007       | 0.001        | 0.617       | 0.648        | 0.638        |
| rs4964059     | <0.001      | 0.486       | <0.001      | <0.001       | <0.001      | <0.001      | <0.001       | <0.001      | <0.001       | 0.884        |
| ss95215858    | 0.103       | 1           | 1           | 0.418        | N/A         | N/A         | N/A          | N/A         | N/A          | N/A          |
| ss95215859    | 1           | N/A         | N/A         | N/A          | 1           | 1           | 0.131        | N/A         | N/A          | N/A          |
| <i>Clock</i>  |             |             |             |              |             |             |              |             |              |              |
| rs1801260     | 0.006       | 0.687       | 0.164       | 0.566        | 0.034       | <0.001      | 0.012        | 0.128       | 0.86         | 0.078        |
| ss95215860    | 1           | N/A         | N/A         | 0.074        | 1           | 1           | <0.001       | N/A         | 0.072        | 0.073        |
| <i>Per2</i>   |             |             |             |              |             |             |              |             |              |              |
| rs2304669     | 0.001       | 0.351       | 0.175       | 0.217        | <0.001      | 0.064       | 0.02         | 0.12        | 0.033        | 0.781        |
| c.1984A>G     | 1           | N/A         | N/A         | N/A          | 1           | 1           | 0.138        | N/A         | N/A          | N/A          |
| rs2304670     | 0.221       | 0.508       | 0.423       | <0.001       | 0.062       | 0.688       | <0.001       | 0.126       | <0.001       | 0.005        |
| rs2304671     | 0.307       | 0.721       | 0.105       | 0.031        | 0.385       | 0.125       | <0.001       | 0.111       | 0.027        | <0.001       |

| <i>Per3</i>  |       |       |       |        |        |        |        |        |        |        |
|--------------|-------|-------|-------|--------|--------|--------|--------|--------|--------|--------|
| rs228669     | 0.534 | 0.061 | 0.203 | 0.035  | 0.36   | 0.33   | 0.037  | 1      | 0.431  | 0.428  |
| c.2460A>G    | 0.19  | N/A   | N/A   | N/A    | 0.195  | 0.202  | 1      | N/A    | N/A    | N/A    |
| rs228696     | 0.196 | 0.27  | 0.03  | 0.014  | 1      | 0.159  | 0.057  | 0.234  | 0.177  | N/A    |
| rs228697     | 0.079 | 0.498 | 0.462 | <0.001 | 0.579  | 0.007  | <0.001 | 0.06   | <0.001 | 0.01   |
| rs17031614   | 1     | N/A   | N/A   | N/A    | 1      | 1      | 0.129  | N/A    | N/A    | N/A    |
| AB047536     | 0.291 | 0.517 | 0.001 | 0.016  | 0.743  | 0.002  | <0.001 | 0.004  | 0.001  | <0.001 |
| rs10462021   | 0.008 | 0.534 | 0.01  | 0.172  | <0.001 | <0.001 | <0.001 | 0.118  | 0.243  | 0.268  |
| <i>AANAT</i> |       |       |       |        |        |        |        |        |        |        |
| rs4238989    | 0.001 | 0.02  | 0.003 | 0.002  | <0.001 | 0.902  | 0.664  | <0.001 | <0.001 | 0.674  |

AA = African American, EA = European American, GA = Ghanaian African, HC = Han Chinese, PNG = Papua New Guinea  
N/A indicates test was not performed because marker was fixed for the same allele in all populations.

**Table S4: Genotype Frequency Differences (p values listed)**

| Marker        | AA vs<br>EA | AA vs<br>GA | AA vs<br>HC | AA vs<br>PNG | EA vs<br>GA | EA vs<br>HC | EA vs<br>PNG | GA vs<br>HC | GA vs<br>PNG | HC vs<br>PNG |
|---------------|-------------|-------------|-------------|--------------|-------------|-------------|--------------|-------------|--------------|--------------|
| <i>Arntl</i>  |             |             |             |              |             |             |              |             |              |              |
| ss95215854    | 1           | 0.017       | N/A         | N/A          | <0.001      | 0.426       | 0.241        | 0.026       | <0.001       | N/A          |
| ss95215855    | 0.058       | N/A         | N/A         | N/A          | 0.154       | 0.166       | 0.012        | N/A         | N/A          | N/A          |
| ss95215856    | 0.259       | 1           | 0.602       | 0.455        | 0.245       | 0.605       | 0.019        | 0.58        | 0.451        | 0.232        |
| <i>Arntl2</i> |             |             |             |              |             |             |              |             |              |              |
| rs5797225     | <0.001      | 0.665       | 0.903       | 0.001        | <0.001      | <0.001      | 0.083        | 0.864       | 0.004        | 0.001        |
| rs7137588     | 0.009       | 0.893       | 0.251       | 0.182        | 0.004       | <0.001      | 0.362        | 0.391       | 0.146        | 0.003        |
| rs11048972    | 0.1         | 0.014       | 1           | 0.165        | 0.017       | 0.062       | <0.001       | 0.009       | <0.001       | 0.169        |
| ss95215857    | 0.134       | N/A         | N/A         | N/A          | 0.153       | 0.148       | 0.063        | N/A         | N/A          | N/A          |
| rs10548381    | 0.031       | 0.55        | 0.364       | 0.198        | 0.04        | 0.027       | 0.003        | 1           | 0.641        | 1            |
| rs4964059     | <0.001      | 0.596       | <0.001      | <0.001       | <0.001      | <0.001      | <0.001       | <0.001      | <0.001       | 0.607        |
| ss95215858    | 0.102       | 1           | 1           | N/A          | N/A         | N/A         | N/A          | N/A         | N/A          | N/A          |
| ss95215859    | 1           | N/A         | N/A         | N/A          | 1           | 1           | 0.127        | N/A         | N/A          | N/A          |
| <i>Clock</i>  |             |             |             |              |             |             |              |             |              |              |
| rs1801260     | 0.035       | 0.334       | 0.45        | 0.169        | 0.046       | <0.001      | 0.011        | 0.015       | 0.839        | 0.011        |
| ss95215860    | 0.197       | N/A         | N/A         | 0.418        | 0.199       | 0.194       | <0.001       | N/A         | 0.071        | 0.071        |
| <i>Per2</i>   |             |             |             |              |             |             |              |             |              |              |
| rs2304669     | 0.01        | 0.614       | 0.469       | 0.354        | 0.001       | 0.199       | 0.073        | 0.116       | 0.03         | 1            |
| c.1984A>G     | 1           | N/A         | N/A         | N/A          | 1           | 1           | 0.132        | N/A         | N/A          | N/A          |
| rs2304670     | 0.238       | 0.786       | 0.603       | <0.001       | 0.077       | 0.864       | <0.001       | 0.206       | <0.001       | 0.005        |
| rs2304671     | 0.488       | 1           | 0.087       | 0.028        | 0.499       | 0.182       | <0.001       | 0.098       | 0.026        | <0.001       |

| <i>Per3</i>  |       |       |        |       |        |        |        |        |        |        |
|--------------|-------|-------|--------|-------|--------|--------|--------|--------|--------|--------|
| rs228669     | 0.121 | 0.622 | 1      | 0.074 | 0.344  | 0.326  | 0.012  | 1      | 0.463  | 0.412  |
| c.2460A>G    | 0.193 | N/A   | N/A    | N/A   | 0.188  | 0.205  | 0.245  | N/A    | N/A    | N/A    |
| rs228696     | 0.113 | 1     | 0.115  | 0.032 | 0.717  | 0.065  | 0.093  | 0.245  | 0.18   | N/A    |
| rs228697     | 0.073 | 0.526 | 0.419  | 0.002 | 1      | 0.001  | <0.001 | 0.054  | <0.001 | 0.042  |
| rs17031614   | 1     | N/A   | N/A    | N/A   | 1      | 1      | 0.127  | N/A    | N/A    | N/A    |
| AB047536     | 0.38  | 0.386 | <0.001 | 0.044 | 0.521  | <0.001 | <0.001 | 0.015  | 0.003  | <0.001 |
| rs10462021   | 0.013 | 0.841 | 0.019  | 0.309 | 0.002  | <0.001 | <0.001 | 0.122  | 0.449  | 0.258  |
| <i>AANAT</i> |       |       |        |       |        |        |        |        |        |        |
| rs4238989    | 0.006 | 0.125 | 0.02   | 0.009 | <0.001 | 0.926  | 0.835  | <0.001 | <0.001 | 0.734  |

AA = African American, EA = European American, GA = Ghanaian African, HC = Han Chinese, PNG = Papua New Guinea  
N/A indicates that the marker was fixed for the same allele in both populations.



**Table S5.** Haplotype frequencies

| Haplotype     | African American | European American | Ghanaian African | Han Chinese | Papua New Guinea |
|---------------|------------------|-------------------|------------------|-------------|------------------|
| <i>Arntl</i>  |                  |                   |                  |             |                  |
| T-G           | 0.98             | 0.98              | 0.92             | 0.99        | 0.96             |
| G-G           | N/A              | 0.01              | 0.06             | N/A         | N/A              |
| <i>Arntl2</i> |                  |                   |                  |             |                  |
| 8-G-A-+-A     | 0.47             | 0.56              | 0.49             | 0.38        | 0.39             |
| 8-G-A-+-C     | N/A              | <0.01             | N/A              | 0.03        | 0.07             |
| 8-C-A-+-C     | 0.02             | 0.11              | N/A              | 0.04        | 0.22             |
| 9-G-A-+-A     | 0.34             | 0.07              | 0.36             | 0.02        | 0.02             |
| 9-G-A-+-C     | 0.02             | 0.05              | 0.02             | 0.48        | 0.26             |
| 9-C-A-+-C     | 0.04             | 0.06              | N/A              | 0.01        | 0.01             |
| 9-C-G---C     | 0.01             | 0.05              | N/A              | <0.01       | N/A              |
| <i>Per2</i>   |                  |                   |                  |             |                  |
| A-A-G         | 0.1              | 0.07              | 0.11             | 0.05        | N/A              |
| A-G-A         | 0.04             | 0.07              | 0.03             | 0.1         | N/A              |
| A-G-G         | 0.82             | 0.73              | 0.83             | 0.78        | 0.94             |
| G-G-G         | 0.03             | 0.13              | 0.01             | 0.06        | 0.06             |
| <i>Per3</i>   |                  |                   |                  |             |                  |
| C-C-C-4-A     | 0.52             | 0.48              | 0.59             | 0.76        | 0.29             |
| C-C-C-4-G     | 0.07             | 0.16              | 0.04             | N/A         | 0.02             |
| C-C-G-4-A     | 0.02             | 0.01              | N/A              | 0.05        | 0.1              |
| C-C-C-5-A     | 0.33             | 0.3               | 0.34             | 0.18        | 0.52             |
| C-C-G-5-A     | N/A              | N/A               | N/A              | <0.01       | 0.06             |

Order of SNPs for each haplotype is as follows:

*Arntl*: (ss95215854/ss95215856)

*Arntl2*: (rs5797225/rs7137588/rs11048972/rs10548381/rs4964059)

*Per2*: (rs2304669/rs2304670/rs2304671)

*Per3*: (rs228669/rs228696/rs228697/AB047536/rs10462021)

N/A indicates that the haplotype was not present in that population.

**Table S6:** Haplotype Trend Regression (p values listed)

| Haplotype              | AA vs<br>EA | AA vs<br>GA | AA vs<br>HC | AA vs<br>PNG | EA vs<br>GA | EA vs<br>HC | EA vs<br>PNG | GA vs<br>HC | GA vs<br>PNG | HC vs<br>PNG |
|------------------------|-------------|-------------|-------------|--------------|-------------|-------------|--------------|-------------|--------------|--------------|
| <i>Arntl</i> (2 SNPs)  | 0.84        | 0.044       | 0.309       | 0.474        | 0.001       | 0.714       | 0.099        | 0.062       | 0.171        | 0.123        |
| <i>Arntl2</i> (5 SNPs) | <0.001      | 0.795       | <0.001      | <0.001       | <0.001      | <0.001      | <0.001       | <0.001      | <0.001       | <0.001       |
| <i>Per2</i> (3 SNPs)   | 0.04        | 0.876       | 0.099       | 0.006        | 0.006       | 0.105       | <0.001       | 0.024       | 0.011        | <0.001       |
| <i>Per3</i> (5 SNPs)   | 0.07        | 0.27        | 0.006       | <0.001       | 0.005       | <0.001      | <0.001       | 0.061       | <0.001       | <0.001       |

AA = African American, EA = European American, GA = Ghanaian African, HC = Han Chinese, PNG = Papua New Guinea

Order of SNPs for each haplotype is as follows:

*Arntl*: ss95215854/ss95215856

*Arntl2*: rs5797225/rs7137588/rs11048972/rs10548381/rs4964059

*Per2*: rs2304669/rs2304670/rs2304671

*Per3*: rs228669/rs228696/rs228697/AB047536/rs10462021

**Table S7:** F<sub>ST</sub> values (theta P) for the five populations together and for the PNG sub-populations.

|               | F <sub>ST</sub> | F <sub>ST</sub> (PNG only) |
|---------------|-----------------|----------------------------|
| <i>Arntl</i>  |                 |                            |
| ss95215854    | 0.043           | N/A                        |
| ss95215855    | 0.013           | N/A                        |
| ss95215856    | 0.005           | 0                          |
| <i>Arntl2</i> |                 |                            |
| rs5797225     | 0.057           | 0.067                      |
| rs7137588     | 0.042           | 0.113                      |
| rs11048972    | 0.028           | N/A                        |
| ss95215857    | 0.020           | N/A                        |
| rs10548381    | 0.025           | 0                          |
| rs4964059     | 0.139           | 0.186                      |
| ss95215858    | 0.012           | N/A                        |
| ss95215859    | 0               | N/A                        |
| <i>Clock</i>  |                 |                            |
| rs1801260     | 0.034           | 0                          |
| ss95215860    | 0.035           | 0.093                      |
| <i>Per2</i>   |                 |                            |
| rs2304669     | 0.031           | 0.061                      |
| c.1984A>G     | 0               | N/A                        |
| rs2304670     | 0.020           | N/A                        |
| rs2304671     | 0.017           | N/A                        |
| <i>Per3</i>   |                 |                            |
| rs228669      | 0.005           | N/A                        |
| c.2460A>G     | 0               | N/A                        |
| rs228696      | 0.008           | N/A                        |
| rs228697      | 0.139           | 0.008                      |
| rs17031614    | 0               | N/A                        |
| AB047536      | 0.059           | 0.059                      |
| rs10462021    | 0.072           | 0.041                      |
| <i>AANAT</i>  |                 |                            |
| rs4238989     | 0.084           | 0                          |

N/A indicates test was not performed because marker was fixed for the same allele in all populations.

**Table S8:** Allele frequencies for all polymorphisms in the Papua New Guinea (PNG) sub-populations with deviations from Hardy/Weinberg Equilibrium (HWE).

| Gene          | Allele   | Eastern Highlands | Nasioi | Coastal           |
|---------------|----------|-------------------|--------|-------------------|
| <i>Arntl</i>  |          |                   |        |                   |
| ss95215854    | T        | 1.00              | 1.00   | 1.00              |
| ss95215855    | A        | 1.00              | 1.00   | 1.00              |
| ss95215856    | G        | 0.93              | 0.98   | 0.98              |
| <i>Arntl2</i> |          |                   |        |                   |
| rs5797225     | GTT (7)  | -                 | -      | -                 |
|               | GTT (8)  | 0.83              | 0.74   | 0.57 <sup>+</sup> |
|               | GTT (9)  | 0.17              | 0.24   | 0.43              |
|               | GTT (10) | -                 | 0.02   | -                 |
| rs7137588     | G        | 0.57              | 0.89   | 0.78              |
| rs11048972    | A        | 1.00              | 1.00   | 1.00              |
| ss95215857    | A        | 1.00              | 1.00   | 1.00              |
| rs10548381    | +        | 1.00              | 0.98   | 0.98              |
| rs4964059     | C        | 0.57              | 0.35   | 0.80              |
| ss95215858    | T        | 1.00              | 1.00   | 1.00              |
| ss95215859    | A        | 1.00              | 1.00   | 1.00              |
| <i>Clock</i>  |          |                   |        |                   |
| rs1801260     | T        | 0.88              | 0.85   | 0.77              |
| ss95215860    | A        | 1.00              | 1.00   | 0.89              |
| <i>Per2</i>   |          |                   |        |                   |
| rs2304669     | A        | 0.95              | 1.00   | 0.86              |
| c.1984A>G     | A        | 1.00              | 1.00   | 1.00              |
| rs2304670     | G        | 1.00              | 1.00   | 1.00              |
| rs2304671     | G        | 1.00              | 1.00   | 1.00              |
| <i>Per3</i>   |          |                   |        |                   |
| rs35426314    | G        | 1.00              | 1.00   | 1.00              |
| rs228669      | C        | 1.00              | 1.00   | 1.00              |
| rs35733104    | C        | 1.00              | 1.00   | 1.00              |
| c.2460A>G     | A        | 1.00              | 1.00   | 1.00              |
| rs228696      | C        | 1.00              | 1.00   | 1.00              |
| rs228697      | C        | 0.76              | 0.89   | 0.84 <sup>+</sup> |
| rs17031614    | G        | 1.00              | 1.00   | 1.00              |
| AB047536      | 5-repeat | 0.74              | 0.46   | 0.57              |
| rs10462021    | A        | 1.00              | 0.93   | 1.00              |
| <i>AANAT</i>  |          |                   |        |                   |
| rs4238989     | G        | 0.55              | 0.48   | 0.50              |

\* indicates deviation from HWE at  $p < 0.05$ ; <sup>+</sup> indicates deviation from HWE at  $p < 0.01$

Eastern Highlands = Gimi and Goroka

Nasioi = Bouganville

Coastal = Sepik and Madang

**Table S9:**  $F_{ST}$  values for clock gene SNPs among the PNG populations.

|               | EH vs<br>NA | EH vs<br>Coastal | NA vs<br>Coastal |
|---------------|-------------|------------------|------------------|
| <i>Arntl</i>  |             |                  |                  |
| ss95215856    | 0.005       | 0                | 0                |
| <i>Arntl2</i> |             |                  |                  |
| rs5797225     | 0           | 0.136            | 0.052            |
| rs7137588     | 0.216       | 0.077            | 0.021            |
| rs10548381    | 0           | 0                | 0                |
| rs4964059     | 0.075       | 0.099            | 0.337            |
| <i>Clock</i>  |             |                  |                  |
| rs1801260     | 0           | 0.017            | 0                |
| ss95215860    | N/A         | 0.090            | 0.096            |
| <i>Per2</i>   |             |                  |                  |
| rs2304669     | 0.031       | 0.019            | 0.119            |
| <i>Per3</i>   |             |                  |                  |
| rs228697      | 0.036       | 0                | 0                |
| AB047536      | 0.132       | 0.039            | 0.002            |
| rs10462021    | 0.041       | N/A              | 0.041            |
| <i>AANAT</i>  |             |                  |                  |
| rs4238989     | 0           | 0                | 0                |

EH = Eastern Highlands (Gimi and Goroka)

NA = Nasioi, Bouganville

Coastal = Sepik, Madang

N/A indicates test was not performed because marker was fixed for the same allele in all populations.

**Table S10:** FST values (theta P) for all pair-wise combinations of populations.

|               | AA vs<br>EA | AA vs<br>GA | AA vs<br>HC | AA vs<br>PNG | EA vs<br>GA | EA vs<br>HC | EA vs<br>PNG | GA vs<br>HC | GA vs<br>PNG | HC vs<br>PNG |
|---------------|-------------|-------------|-------------|--------------|-------------|-------------|--------------|-------------|--------------|--------------|
| <i>Arntl</i>  |             |             |             |              |             |             |              |             |              |              |
| ss95215854    | 0           | 0.06        | N/A         | N/A          | 0.11        | 0           | 0            | 0.049       | 0.074        | N/A          |
| ss95215855    | 0.012       | N/A         | N/A         | N/A          | 0.011       | 0.011       | 0.013        | N/A         | N/A          | N/A          |
| ss95215856    | 0           | 0           | 0           | 0            | 0.001       | 0           | 0.027        | 0           | 0            | 0.007        |
| <i>Arntl2</i> |             |             |             |              |             |             |              |             |              |              |
| rs5797225     | 0.092       | 0           | 0           | 0.086        | 0.068       | 0.101       | 0            | 0           | 0.062        | 0.095        |
| rs7137588     | 0.041       | 0           | 0.012       | 0.027        | 0.048       | 0.094       | 0            | 0.006       | 0.035        | 0.091        |
| rs11048972    | 0.01        | 0.069       | 0           | 0.017        | 0.025       | 0.011       | 0.034        | 0.07        | 0.143        | 0.016        |
| ss95215857    | 0.017       | N/A         | N/A         | N/A          | 0.017       | 0.017       | 0.02         | N/A         | N/A          | N/A          |
| rs10548381    | 0           | 0.02        | 0.021       | 0.037        | 0.029       | 0.029       | 0.037        | 0           | 0            | 0            |
| rs4964059     | 0.115       | 0           | 0.404       | 0.389        | 0.094       | 0.11        | 0.112        | 0.366       | 0.354        | 0            |
| ss95215858    | 0.043       | 0           | 0           | 0.004        | N/A         | N/A         | N/A          | N/A         | N/A          | N/A          |
| ss95215859    | 0           | N/A         | N/A         | N/A          | 0           | 0           | 0            | N/A         | N/A          | N/A          |
| <i>Clock</i>  |             |             |             |              |             |             |              |             |              |              |
| rs1801260     | 0.036       | 0           | 0.003       | 0            | 0.018       | 0.076       | 0.02         | 0.021       | 0            | 0.021        |
| ss95215860    | 0           | N/A         | N/A         | 0.024        | 0           | 0           | 0.078        | N/A         | 0.024        | 0.024        |
| <i>Per2</i>   |             |             |             |              |             |             |              |             |              |              |
| rs2304669     | 0.039       | 0           | 0           | 0.001        | 0.058       | 0.015       | 0.017        | 0.025       | 0.023        | 0            |
| c.1984A>G     | 0           | N/A         | N/A         | N/A          | 0           | 0           | 0            | N/A         | N/A          | N/A          |
| ss95215862    | 1           | N/A         | N/A         | N/A          | 1           | 1           | 1            | N/A         | N/A          | N/A          |
| rs2304670     | 0.001       | 0           | 0.001       | 0.112        | 0.018       | 0           | 0.04         | 0.018       | 0.15         | 0.064        |
| rs2304671     | 0.001       | 0           | 0.026       | 0.04         | 0           | 0.007       | 0.039        | 0.022       | 0.045        | 0.124        |

| <u>Per3</u>  |       |       |       |       |       |       |       |       |       |       |
|--------------|-------|-------|-------|-------|-------|-------|-------|-------|-------|-------|
| rs228669     | 0     | 0.009 | 0.008 | 0.04  | 0.001 | 0.001 | 0.013 | 0     | 0.003 | 0.003 |
| c.2460A>G    | 0     | N/A   | N/A   | N/A   | 0     | 0     | 0     | N/A   | N/A   | N/A   |
| rs228696     | 0.006 | 0.002 | 0.042 | 0.051 | 0     | 0.009 | 0.011 | 0.012 | 0.016 | N/A   |
| rs228697     | 0     | 0.01  | 0.003 | 0.1   | 0     | 0.056 | 0.313 | 0.041 | 0.139 | 0.053 |
| rs17031614   | 0     | N/A   | N/A   | N/A   | 0     | 0     | 0     | N/A   | N/A   | N/A   |
| AB047536     | 0.002 | 0     | 0.102 | 0.05  | 0     | 0.048 | 0.108 | 0.066 | 0.083 | 0.27  |
| rs10462021   | 0.032 | 0     | 0.063 | 0.017 | 0.057 | 0.101 | 0.078 | 0.032 | 0     | 0.011 |
| <u>AANAT</u> |       |       |       |       |       |       |       |       |       |       |
| rs4238989    | 0.075 | 0.044 | 0.076 | 0.094 | 0.206 | 0     | 0     | 0.23  | 0.246 | 0     |

AA = African American, EA = European American, GA = Ghanaian African, HC = Han Chinese, PNG = Papua New Guinea  
 N/A indicates test was not performed because marker was fixed for the same allele in all populations.

**Figure S1.** Histogram plots of *Arntl* and *Arntl2* SNPs. Labels: AA = African American, EA = European Americans, HC = Han Chinese, GA = Ghana Africans, and PNG = Papua New Guineans; gray is the common allele, black is the less common

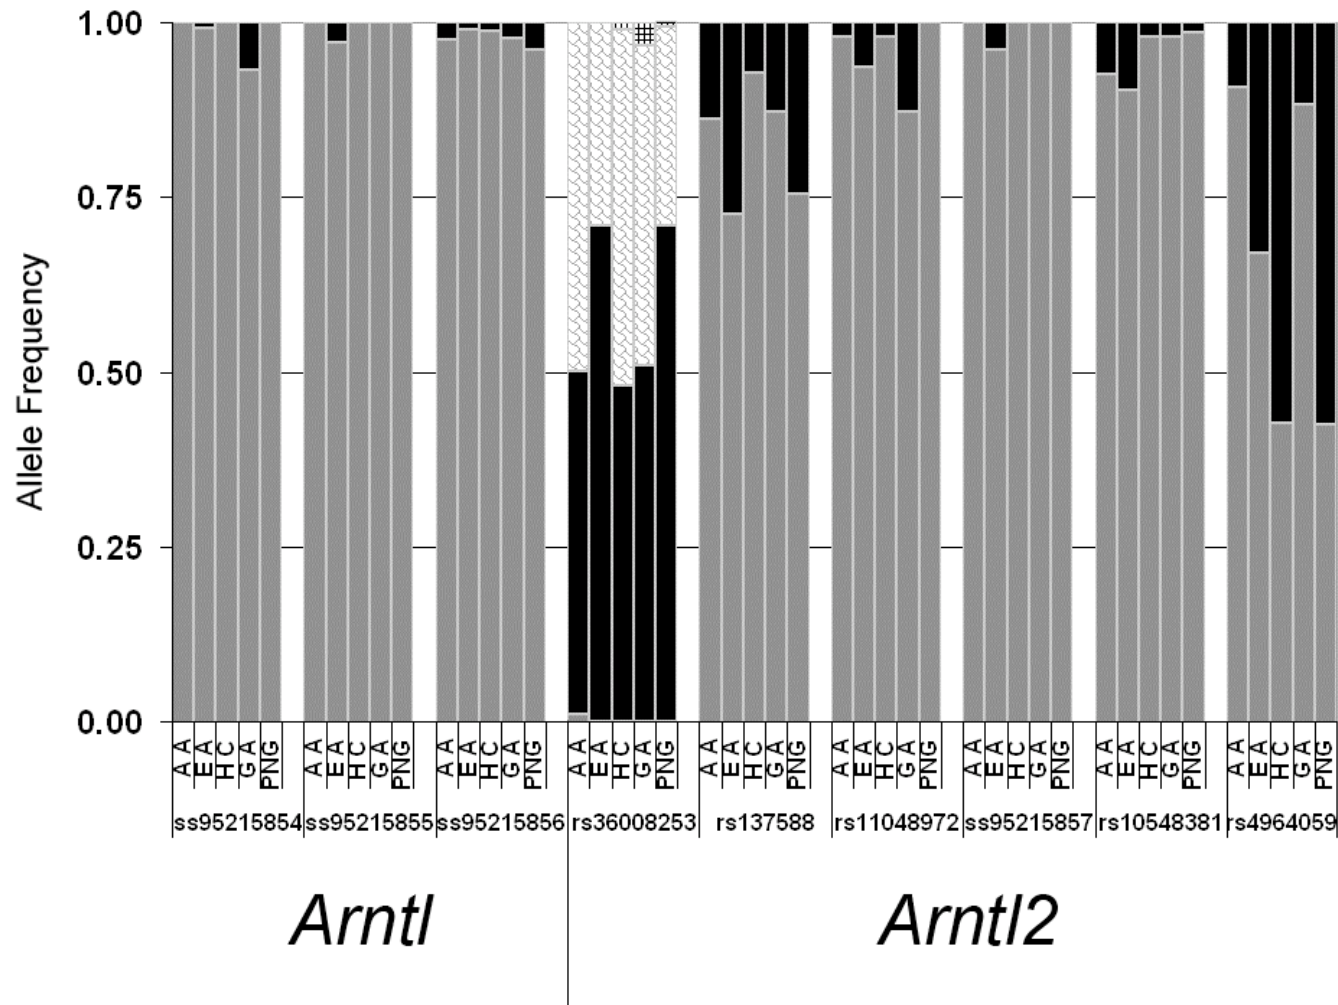

polymorphism.  
For rs36008253,  
the number of  
TTG repeats is  
depicted as:  
solid gray = 7,  
black = 8, gray  
scalloping = 9,  
and cross-  
hatching = 10.



**Figure S2.** histogram plots of SNPs in *hClock* (rs1801260; panel A) and *hAANAT* (rs4238989; panel B). Labels: AA = African American, EA = European Americans, HC = Han Chinese, GA = Ghana Africans, and PNG = Papua New Guineans.

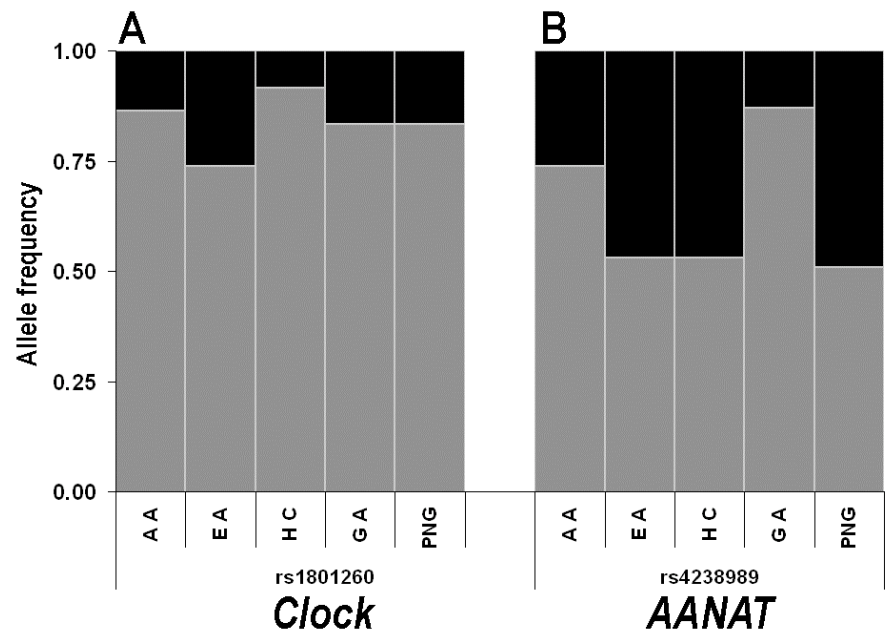

Supplement: NIHMS75029-supplement-01.pdf [file NIHMS75029-supplement-01.pdf]
